# Supplementary material for: Activation of monocytic cells by immunostimulatory lipids conjugated to peptide antigens
Source: Royal Society of Chemistry journal article supplement (doi:10.1039/c2mb25064k), 2012-05-10
Supplement: c2mb25064k.pdf [file c2mb25064k.pdf]

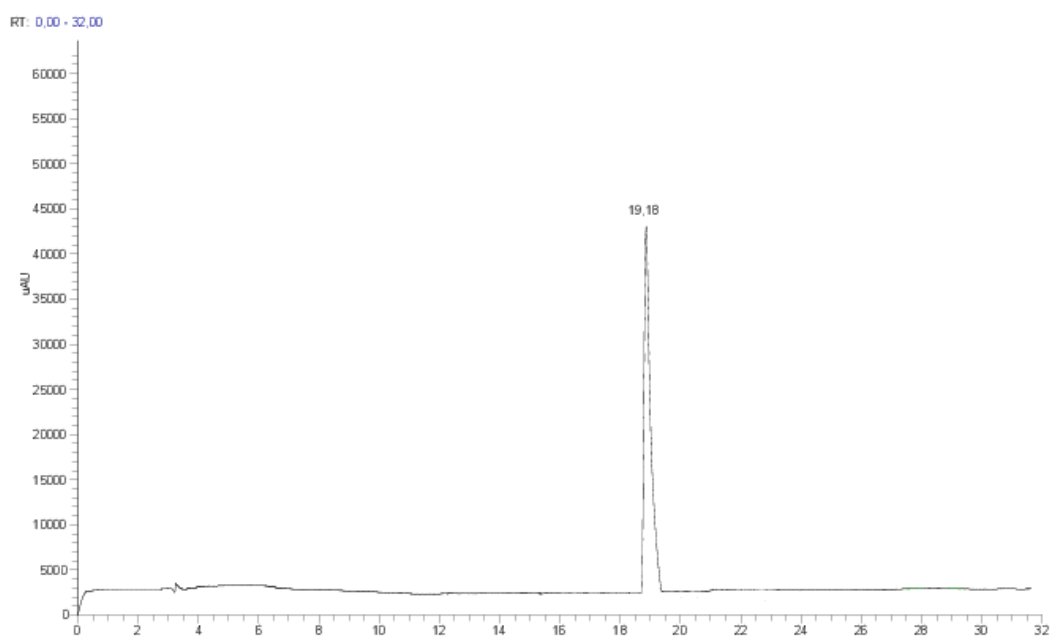

Figure 1 Analytical HPLC profile of purified (LCP-gB)

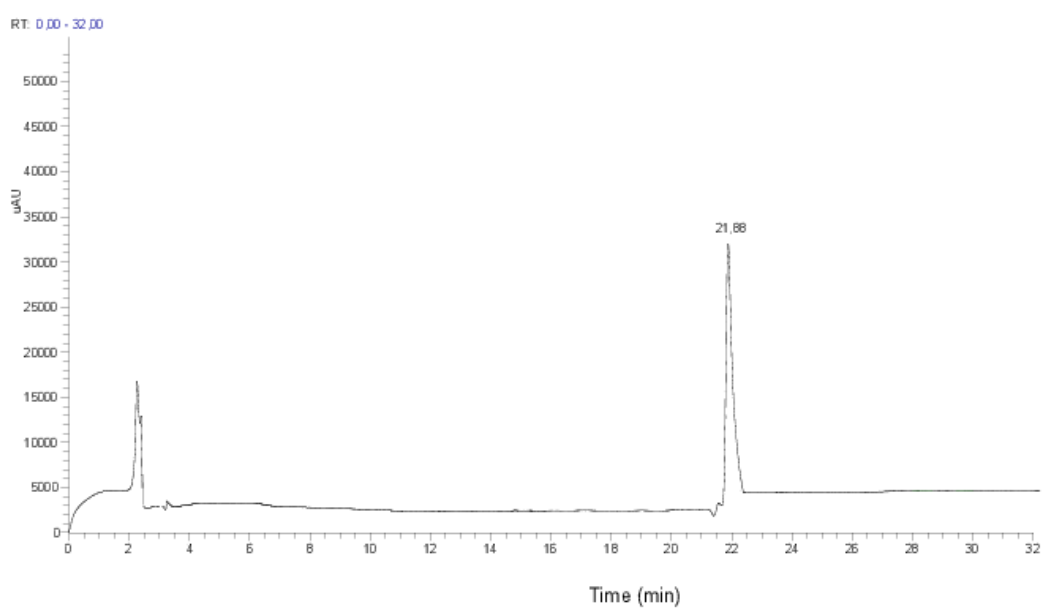

Figure 2 Analytical HPLC profile of purified (LCP-gD)
