# Supplementary material for: Activation of monocytic cells by immunostimulatory lipids conjugated to peptide antigens
Source: Royal Society of Chemistry journal article supplement (doi:10.1039/c2mb25064k), 2012-05-10
Supplement: c2mb25064k_2.pdf [file c2mb25064k_2.pdf]

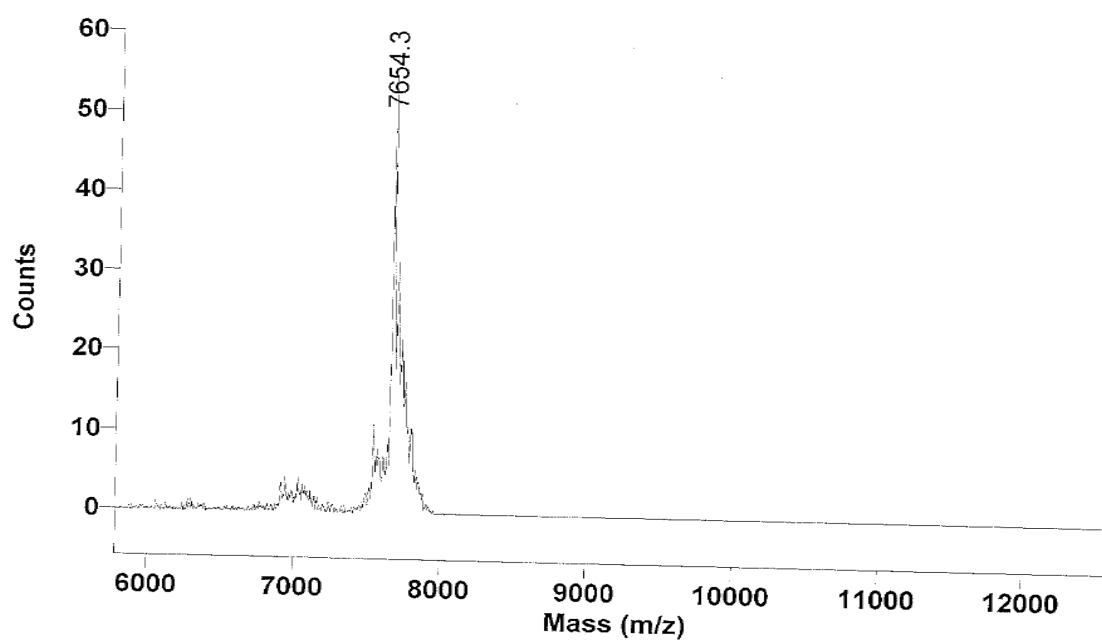

Supplementary Figure 1: LCP-gD Maldi TOF spectrum

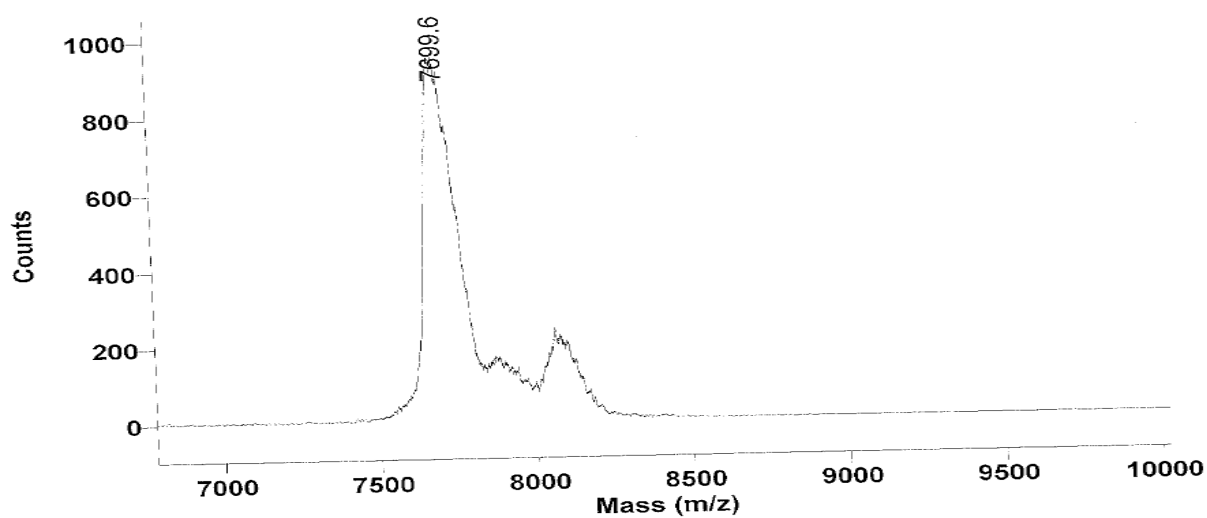

Supplementary Figure 2 LCP-gB Maldi TOF spectrum
